# Supplementary material for: Synthesizing nonstoichiometric Li3−3xV2+x(PO4)3/C as cathode materials for high-performance lithium-ion batteries by solid state reaction
Source: Royal Society of Chemistry journal article supplement (doi:10.1039/c7ra04842d), 2017-01-01
Supplement: c7ra04842d1.pdf [file c7ra04842d1.pdf]

# Synthesizing Nonstoichiometric $\text{Li}_{3-3x}\text{V}_{2+x}(\text{PO}_4)_3/\text{C}$ as Cathode Materials for High-performance Lithium-ion Batteries by Solid State Reaction

Pingping Sun <sup>1</sup>, Ningang Su <sup>1</sup>, Yuanting Wang <sup>1</sup>, Qingyu Xu <sup>1,2\*</sup>, Qi Fan <sup>3\*</sup>, Yueming Sun<sup>3</sup>

<sup>1</sup> Department of Physics, Southeast University, Nanjing 211189, China

<sup>2</sup> National Laboratory of Solid State Microstructures, Nanjing University, Nanjing 210093, China

<sup>3</sup> College of Chemistry and Chemical Engineering, Southeast University, Nanjing 211189, China

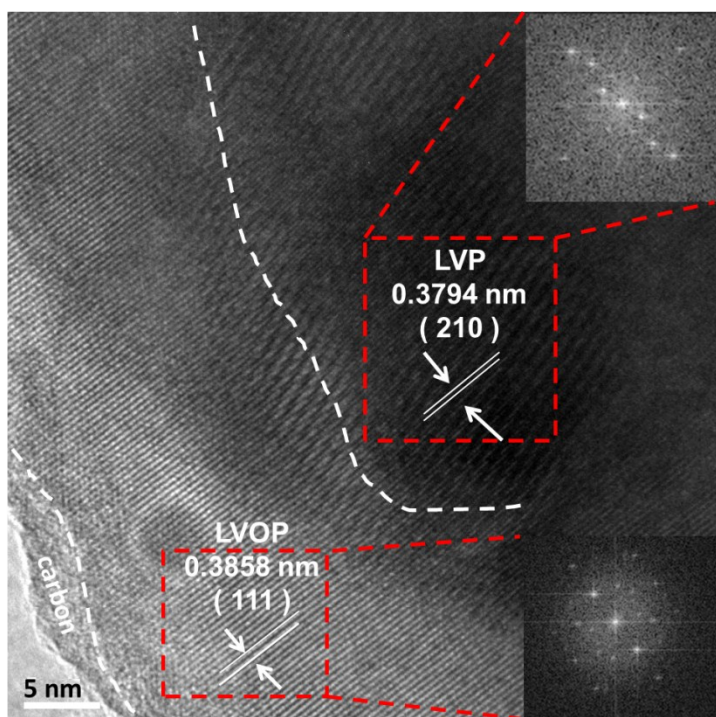

Fig. S1 HRTEM image of LVP-0.10.

A typical HRTEM image (Fig. S1) is presented to investigate the structure of LVP-0.10. Two types of lattice fringes are found in the composites: the  $\text{Li}_3\text{V}_2(\text{PO}_4)_3$  lattice

fringe with an interplanar spacing of 0.3794 nm that corresponds to the (210) lattice planes; and the  $\text{LiVOPO}_4$  lattice fringe with an interplanar spacing of 0.3858 nm that corresponds to the (111) lattice planes. Fast Fourier transform (FFT) was performed in the selected crystal planes to confirm the different phases, as shown in inset. The FFT images of the selected regions show the diffraction patterns of  $\text{Li}_3\text{V}_2(\text{PO}_4)_3$  and  $\text{LiVOPO}_4$ , respectively. Different diffraction patterns are obtained, indicating that two phases coexist in the samples. The HRTEM image confirms the  $\text{Li}_3\text{V}_2(\text{PO}_4)_3$  core and  $\text{LiVOPO}_4$  shell structure, similar to our previous report. [1]

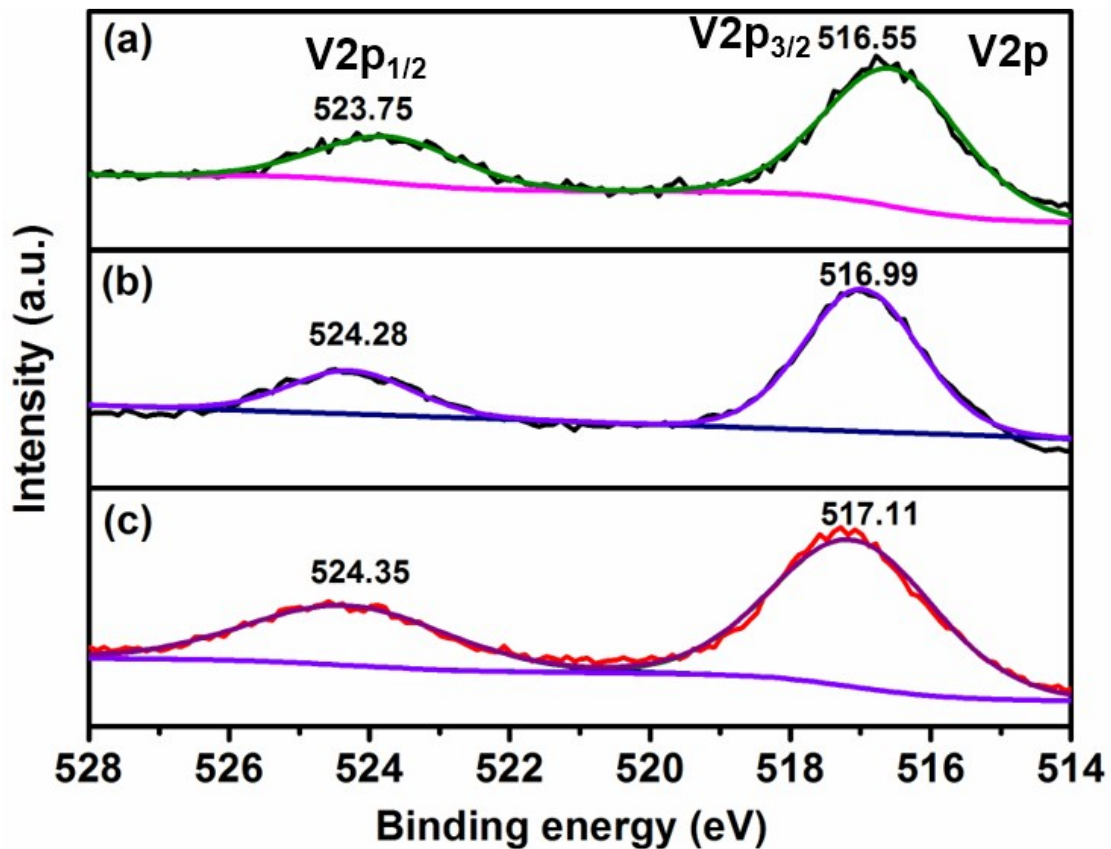

Fig. S2 V2p XPS spectra of LVP-0.10 prepared by (a) sol-gel, (b) sol-gel + ball mill, (c) solid state reaction.

XPS is provided to detect the surface phase. V2p peaks of LVP-0.10 (Fig. S2) prepared by solid state reaction significantly shifts to higher binding energy, compared with that prepared by sol-gel method [2] and is close to that prepared by sol-gel with ball mill method [1]. The binding energies are consistent with those of  $\text{V}^{4+}$  in  $\text{LiVOPO}_4$ .

Table S1. The comparison of electrochemical performance among  $\text{Li}_3\text{V}_2(\text{PO}_4)_3$  nanocomposites.

| Active Nanomaterials                                                                        | 10C                                                      | 20C          | Cycle Number | References |
|---------------------------------------------------------------------------------------------|----------------------------------------------------------|--------------|--------------|------------|
|                                                                                             | Specific Capacity(mAh/g)<br>3-4.3V before (after cycles) |              |              |            |
| Hierarchical $\text{Li}_3\text{V}_2(\text{PO}_4)_3/\text{C}$ Mesoporous Nanowires           | 117                                                      | /            | /            | 3          |
| $\text{Li}_3\text{V}_2(\text{PO}_4)_3$ /PEDOT composite                                     | 122(122)                                                 | /            | 100          | 4          |
| $\text{Li}_3\text{V}_2(\text{PO}_4)_3$ 3D Foams                                             | 112                                                      | 105          |              | 5          |
| Ionic-Liquid-Assisted Synthesis $\text{Li}_3\text{V}_2(\text{PO}_4)_3$                      | 108(102.6)                                               | 105(100)     | 100          | 6          |
| Hierarchical Carbon Decorated $\text{Li}_3\text{V}_2(\text{PO}_4)_3$                        | 123                                                      | 122(94)      | 4000         | 7          |
| $\text{Li}_3\text{V}_2(\text{PO}_4)_3$ /graphene nanocomposites                             | /                                                        | 109(108)     | 100          | 8          |
| core-shell structured $\text{Li}_3\text{V}_2(\text{PO}_4)_3@\text{C}$                       | 97.9(107.8)                                              | /            | 300          | 9          |
| LVP/C + $\text{RuO}_2$                                                                      | 102.5(101)                                               | /            | 100          | 10         |
| Sol-gel synthesized $\text{Li}_{3-3x}\text{V}_{2+x}(\text{PO}_4)_3/\text{C}$                | 126                                                      | 92.5         | 85.1         | 2          |
| Core-shell-structured $\text{Li}_3\text{V}_2(\text{PO}_4)_3\text{-LiVOPO}_4$ nanocomposites | 121.5                                                    | 116.3(111)   | 1000         | 1          |
| Solid state reaction synthesized $\text{Li}_{3-3x}\text{V}_{2+x}(\text{PO}_4)_3/\text{C}$   | 124.6                                                    | 124.3(122.2) | 1000         | This work  |

Table S2. The comparison of electrochemical performance among  $\text{Li}_3\text{V}_2(\text{PO}_4)_3$  nanocomposites made by different methods.

| Method              | 10C                                                      | 20C          | Cycle Number | References |
|---------------------|----------------------------------------------------------|--------------|--------------|------------|
|                     | Specific Capacity(mAh/g)<br>3-4.3V before (after cycles) |              |              |            |
| Sol-gel             | 126                                                      | 92.5         | 85.1         | 2          |
| Sol-gel + ball mill | 121.5                                                    | 116.3(111)   | 1000         | 1          |
| Ball mill           | 124.6                                                    | 124.3(122.2) | 1000         | This work  |

Table S3. The comparison of electrochemical kinetic parameters among  $\text{Li}_3\text{V}_2(\text{PO}_4)_3$  nanocomposites prepared by different methods.

| Method            | Li diffusion coefficient<br>$D_{\text{Li}^+}$ ( $\text{cm}^2 \text{s}^{-1}$ ) | Electron conductivity<br>$\sigma_e$ ( $\text{S cm}^{-1}$ ) | Charge transfer resistance<br>$R_{ct}$ ( $\Omega$ ) | Reference |
|-------------------|-------------------------------------------------------------------------------|------------------------------------------------------------|-----------------------------------------------------|-----------|
| Sol-gel           | $1.45 \times 10^{-9}$                                                         | $9.54 \times 10^{-5}$                                      | 92.7                                                | 2         |
| Sol-gel+ball mill | $1.04 \times 10^{-9}$                                                         | $1.77 \times 10^{-4}$                                      | 50                                                  | 1         |
| Ball mill         | $1.84 \times 10^{-9}$                                                         | $1.42 \times 10^{-4}$                                      | 62.4                                                | This work |

## References

- [1] P. Sun, X. Wang, K. Zhu, X. Chen, X. Cui, Q. Xu, D. Su, Q. Fan, Y. Sun, *RSC Adv.*, 2017, **7**, 3101–3107.
- [2] P. Sun, S. Qin, X. Wang, R. An, Q. Xu, X. Cui, Y. Sun, S. Wang, P. Wang, Q. Fan, *J. Power Sources*, 2015, **293**, 922–928.
- [3] Q. Wei, Q. An, D. Chen, L. Mai, S. Chen, Y. Zhao, K.M. Hercule, L. Xu, A. Minhas-Khan, Q. Zhang, *Nano Lett.*, 2014, **14**, 1042–1048.
- [4] J. Kim, J.K. Yoo, Y.S. Jung, K. Kang, *Adv. Energy Mater.*, 2013, **3**, 1004–1007.
- [5] Y. Zhou, X. Rui, W. Sun, Z. Xu, Y. Zhou, W.J. Ng, Q. Yan, E. Fong, *ACS Nano*, 2015, **9**, 4628–4635.
- [6] X. Zhang, N. Bçckenfeld, F. Berkemeier, A. Balducci, *ChemSusChem*, 2014, **7**, 1710–1718.
- [7] Y. Luo, X. Xu, Y. Zhang, Y. Pi, Y. Zhao, X. Tian, Q. An, Q. Wei, L. Mai, *Adv. Energy Mater.* 2014, **1400107**, 1-8.

- [8] H. Liu, P. Gao, J. Fang, G. Yang, *Chem. Commun.*, 2011, **47**, 9110–9112.
- [9] C. Wang, H. Liu, W. Yang, *J. Mater. Chem.*, 2012, **22**, 5281–5285.
- [10] R. Zhang, Y. Zhang, K. Zhu, F. Du, Q. Fu, X. Yang, Y. Wang, X. Bie, G. Chen, Y. Wei, *ACS Appl. Mater. Interfaces*, 2014, **6**, 12523–12530.
